# Supplementary material for: MG53 Inhibits Necroptosis Through Ubiquitination-Dependent RIPK1 Degradation for Cardiac Protection Following Ischemia/Reperfusion Injury
Source: PubMed Central journal article supplement (PMC9193967; doi:10.3389/fcvm.2022.868632), 2022-05-31
Supplement: Data_Sheet_1.pdf [file Data_Sheet_1.pdf]

Supplemental Figure s1. Wang et al

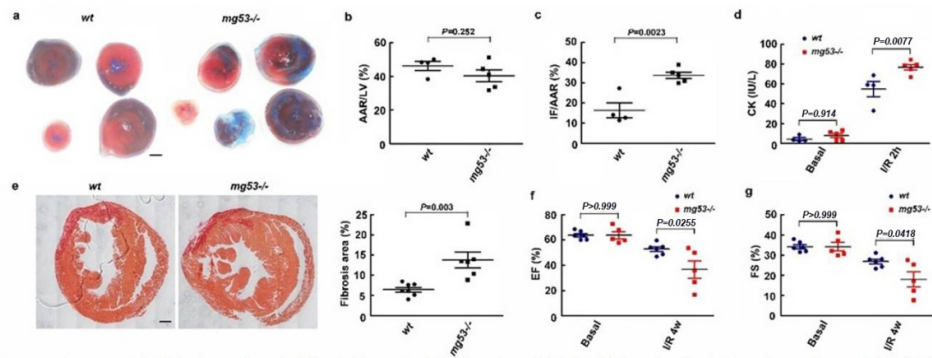

**Supplemental Figure s1.** (a) Photographs of TTC staining of *wt* (left) and *mg53*<sup>-/-</sup> (right) hearts. Scale bar: 1mm. Area at risk (AAR)/left ventricle (LV) ratio (b) and infarct size (IF)/AAR ratio (c) of hearts derived from *wt* and *mg53*<sup>-/-</sup> following I/R injury mice. n=4 for *wt* and 5 for *mg53*<sup>-/-</sup>. (d) Plasma CK level from *wt* and *mg53*<sup>-/-</sup> mice was measured at indicated time points. n=4 for *wt* and 5 for *mg53*<sup>-/-</sup>. (e) Photographs of Picrosirius red staining of *wt* (left) and *mg53*<sup>-/-</sup> (middle) hearts on 4 weeks after I/R injury. Fibrosis area was quantified (right) by ImageJ. n=7 for *wt* and 6 for *mg53*<sup>-/-</sup>; scale bar, 500  $\mu$ m. Ejection fraction (EF) (f) and fractional shortening (FS) (g) of *wt* and *mg53*<sup>-/-</sup> hearts were measured by echocardiogram. n=7 for *wt* and 6 for *mg53*<sup>-/-</sup>.

Supplemental Figure s2. Wang et al

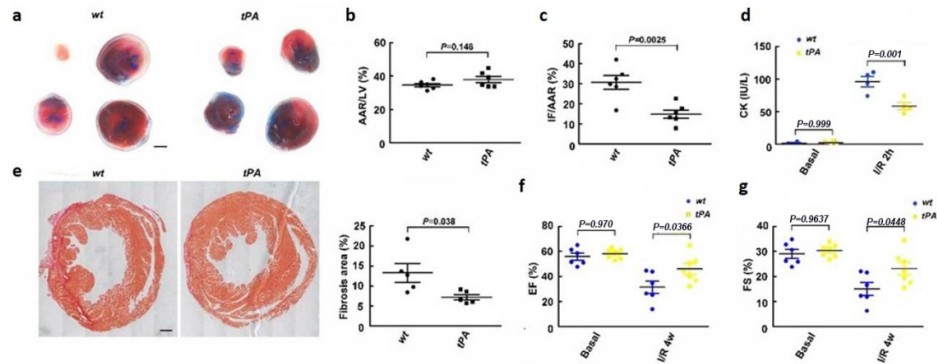

**Supplemental Figure s2.** (a) Photographs of TTC staining of wt (*left*) and tPA-MG53 (*right*) hearts. Scale bar: 1mm. AAR/LV (b) and IF/AAR (c) of wt and tPA-MG53 were quantified. (d) CK release in wt and tPA-MG53 was measured at basal and 2 hr after reperfusion, n=6 mice per group. Four week after I/R injury, cardiac fibrosis in wt and tPA-MG53 hearts was determined by Picrosirius red staining (scale bar: 500  $\mu$ m) and quantified by ImageJ (n=5 per group) (e). Echocardiogram was used to determine EF (f) and FS (g) of wt and tPA-MG53 hearts at basal and 4 weeks after I/R injury (n=6 for wt and 7 for tPA-MG53).

Supplemental Figure s3. Wang et al

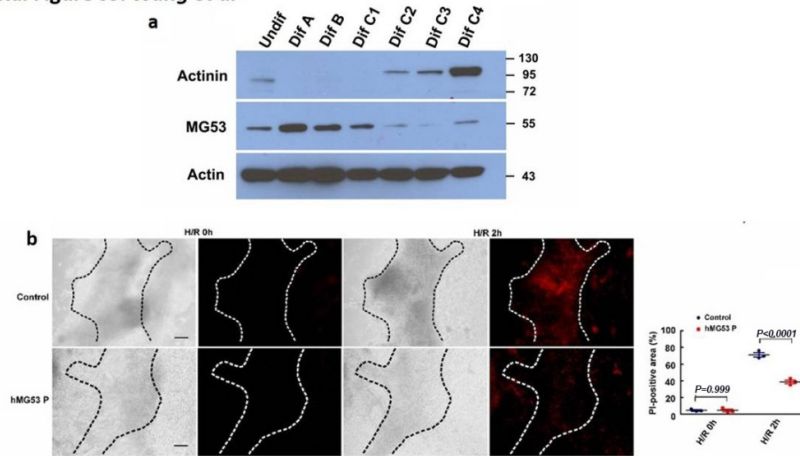

**Supplemental figure s3. (a)** Dynamic expression of MG53 was determined by Western blot. Undif: human iPSC, Dif A: iPSC in differentiation medium A; Dif B: iPSC in differentiation medium B; Dif C1 (C2, C3, and C4): iPSC in differentiation medium C for 1day (2 days, 3 days and 4 days), The beating iPSC derived cardiomyocytes are usually observed on day 3 in differentiation medium C. **(b)** PI staining and quantification of human iPS derived cardiomyocyte following H/R stress with or without rhMG53 treatment. Scale bar, 100  $\mu$ m. Data are mean  $\pm$  SEM.

Supplemental Figure s4. Wang et al

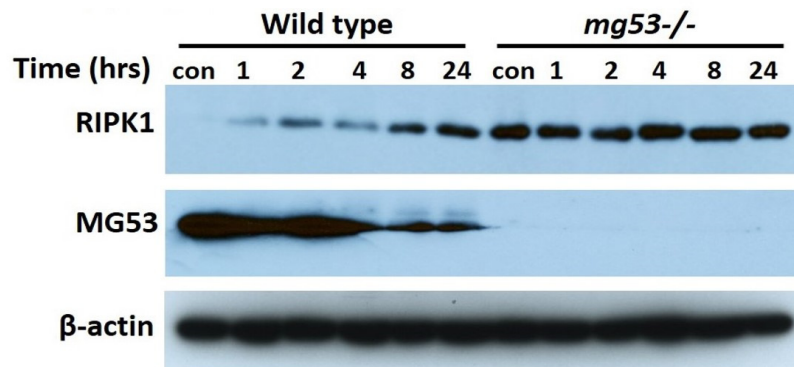

**Figure s4** Dynamic expression of RIPK1 and MG53 was determined by Western blot at indicated time points in wt C2C12 cells (wild type) and *mg53*<sup>-/-</sup> C2C12 cells (*mg53*<sup>-/-</sup>) following 12 hr hypoxia and reperfusion (1, 2, 4, 8 and 24 hrs). While expression of MG53 declined and RIPK1 expression increased following reperfusion in C2C12 cells, expression of RIPK1 remained high throughout all reperfusion time points in *mg53*<sup>-/-</sup> C2C12 cells.
